# Supplementary material for: Episodic swimming behavior in the nematodeC. elegans
Source: Oxford University Press journal article supplement (doi:10.1242/jeb.023606), 2008-11-14
Supplement: jeb023606-sup-023606figs1.pdf [file jeb023606-sup-023606figs1.pdf]

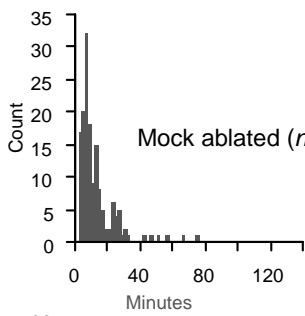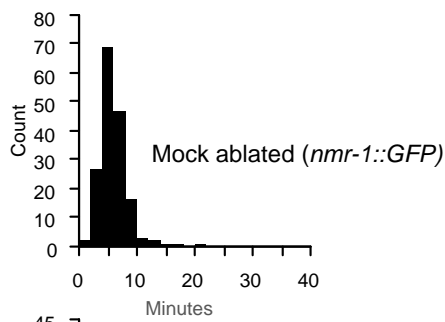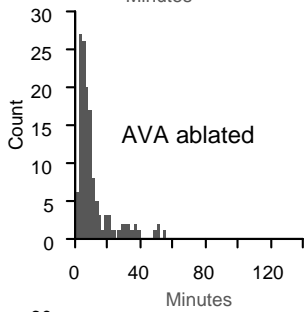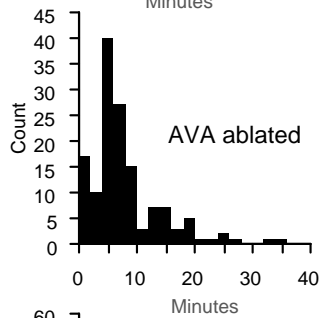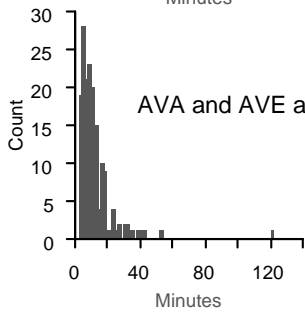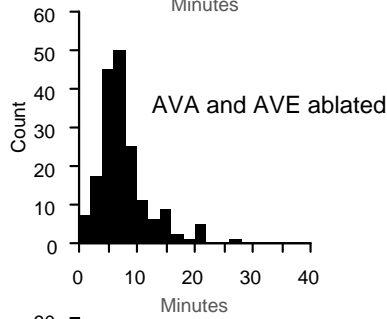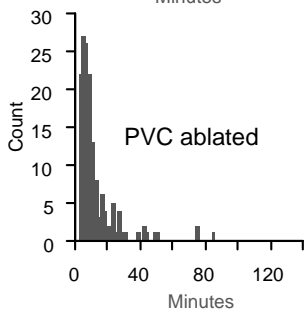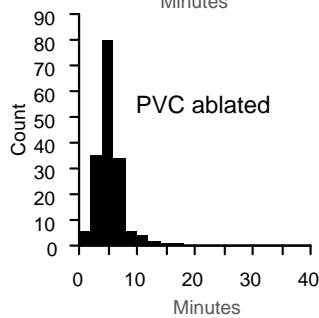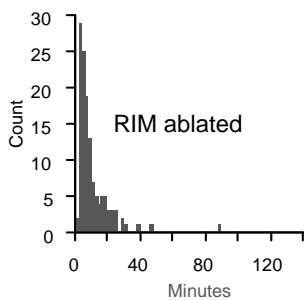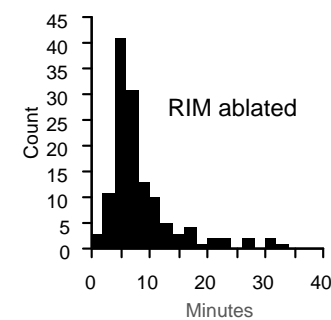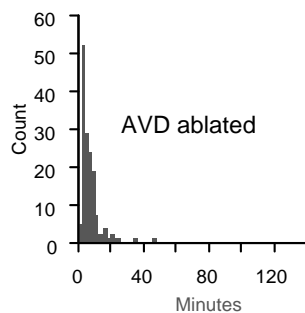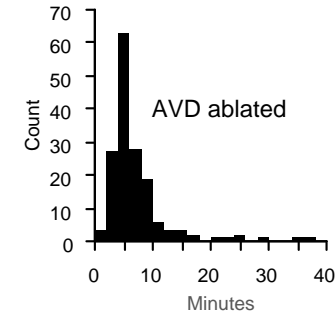

Suppl. Fig. 1. Lengths of swim (left) and quiescent (right) bouts after ablation of the neurons shown. See Suppl. Table 1 for statistics.
