# Supplementary material for: Episodic swimming behavior in the nematodeC. elegans
Source: Oxford University Press journal article supplement (doi:10.1242/jeb.023606), 2008-11-14
Supplement: jeb023606-tables1.pdf [file jeb023606-tables1.pdf]

Table S1. Swimming and quiescent bouts for nematode worms

|                                           | Mean (min) | s.d.  | s.e.m. | No. of bouts/worms | P-values                 |
|-------------------------------------------|------------|-------|--------|--------------------|--------------------------|
| Swimming bout                             |            |       |        |                    |                          |
| <i>nmr-1::GFP</i> mock                    | 12.3       | 11.51 | 0.9    | 153/24             | n.a.                     |
| AVA ablated                               | 10.1       | 11.04 | 0.9    | 135/16             | 0.09 n.s.*               |
| AVA and AVE ablated                       | 11.6       | 11.99 | 0.9    | 167/17             | 0.5324 n.s.*             |
| AVD ablated                               | 6.4        | 6.04  | 0.5    | 151/17             | <0.0001*                 |
| PVC ablated                               | 11.9       | 13.19 | 1.1    | 154/16             | 0.7435 n.s.*             |
| RIM ablated                               | 9.6        | 10.66 | 0.9    | 129/16             | 0.04 n.s.*               |
| Wild-type raised 20°C, assay 20°C         | 42.7       | 32.02 | 6.7    | 23/16              | <0.0001 <sup>†</sup>     |
| Wild-type raised 25°C, assay 20°C         | 46.3       | 35.65 | 6.9    | 27/15              | <0.0001 <sup>†</sup>     |
| Wild-type assayed in <i>E.coli</i> (Op50) | 12.7       | 13.75 | 1.1    | 167/32             | 0.2860 n.s. <sup>†</sup> |
| Quiescent bout                            |            |       |        |                    |                          |
| <i>nmr-1::GFP</i> mock                    | 5.7        | 3.66  | 0.3    | 170/24             | n.a.                     |
| AVA ablated                               | 8.5        | 10.14 | 0.8    | 143/24             | 0.0003*                  |
| AVA and AVE ablated                       | 7.2        | 4.35  | 0.3    | 179/17             | 0.0446 n.s.*             |
| AVD ablated                               | 7.2        | 7.66  | 0.6    | 163/17             | 0.042 n.s.*              |
| PVC ablated                               | 4.9        | 2.29  | 0.2    | 169/16             | 0.2639 n.s.*             |
| RIM ablated                               | 9.2        | 10.22 | 0.9    | 134/16             | <0.0001*                 |
| Wild-type raised 20°C, assay 20°C         | 4.8        | 1.73  | 0.3    | 35/16              | 0.9965 n.s. <sup>†</sup> |
| Wild-type raised 25°C, assay 20°C         | 5.4        | 2.65  | 0.4    | 41/15              | 0.6296 n.s. <sup>†</sup> |
| Wild-type assayed in <i>E.coli</i> (OP50) | 9.3        | 15.69 | 1.1    | 189/32             | <0.0001 <sup>†</sup>     |

P-values are for comparison with wild-type (<sup>†</sup>) under standard assay conditions (raised 20°C on *E. coli*, assay 25°C without *E. coli*) or mock ablation (\*). n.s., non-significant difference. n.a., not applicable.
